# Supplementary material
Source: Royal Society of Chemistry journal article supplement (doi:10.1039/d5se01694k)
Supplement: d5se01694k1.pdf [file d5se01694k1.pdf]

## Supporting Information

### **An integrated techno-economic-environmental-policy assessment of supercritical biodiesel production: Pathway to competitiveness**

Jon Selimi<sup>a,b+</sup>, Abdullah H. Albin Saad<sup>c+</sup>, Essra R. Altahir<sup>d</sup>, Mayasem A. Alsuhami<sup>c</sup>, Mohd A.

Khan<sup>c,e\*</sup>, Rashed M. Aleisa<sup>c\*</sup>, Christian P. Hulteberg<sup>a,b</sup>, Omar Y. Abdelaziz<sup>d,f\*</sup>

<sup>a</sup>*Division of Chemical Engineering, Department of Process and Life Science Engineering, Lund University, SE-221 00 Lund, Sweden*

<sup>b</sup>*Hulteberg Chemistry & Engineering AB, SE-212 25 Malmö, Sweden*

<sup>c</sup>*Fuels & Chemicals Division, Research & Development Center, Saudi Aramco, Dhahran 31311, Saudi Arabia*

<sup>d</sup>*Department of Chemical Engineering, King Fahd University of Petroleum & Minerals, Dhahran 31261, Saudi Arabia*

<sup>e</sup>*Department of Chemical and Materials Engineering, University of Alberta, Donadeo Innovation Centre for Engineering, Edmonton, Alberta T6G 1H9, Canada*

<sup>f</sup>*Interdisciplinary Research Center for Refining & Advanced Chemicals, King Fahd University of Petroleum & Minerals, Dhahran 31261, Saudi Arabia*

<sup>+</sup>These authors contributed equally to this work.

\*Correspondence: [omar.abdelaziz@kfupm.edu.sa](mailto:omar.abdelaziz@kfupm.edu.sa); [mohd3@ualberta.ca](mailto:mohd3@ualberta.ca); [rashed.aleisa@aramco.com](mailto:rashed.aleisa@aramco.com)

**Table S1.** Cost factors used for CAPEX estimation. *Source:* Peters, M. S.; Timmerhaus, K. D.; West, R. E. *Plant Design and Economics for Chemical Engineers*, 5th ed.; McGraw-Hill, 2003.

| <b>Cost Component</b>             | <b>Factor (fraction of bare equipment cost)</b> |
|-----------------------------------|-------------------------------------------------|
| Equipment erection                | 0.3                                             |
| Piping                            | 0.8                                             |
| Instrumentation & control         | 0.3                                             |
| Electrical                        | 0.2                                             |
| Civil works                       | 0.2                                             |
| Structures and buildings          | 0.2                                             |
| Insulation (lagging) and painting | 0.1                                             |
| Offsites (OSBL)                   | 0.3                                             |
| Design and engineering            | 0.3                                             |
| Contingency                       | 0.1                                             |
| Working capital (fraction of FCI) | 0.1                                             |

**Table S2.** Financial parameters and raw material costs for base case TEA.

| <b>Financial parameters</b>                                   | <b>Value</b> | <b>Ref</b> |
|---------------------------------------------------------------|--------------|------------|
| Discount rate/Interest rate (%)                               | 10.7%        | 1, 2       |
| Taxes (%)                                                     | 30.0%        | 1          |
| Indirect costs (% of direct costs)                            | 30%          | 3          |
| Design and engineering costs (% of direct and indirect costs) | 30%          | 3          |
| Contingency (% of direct and indirect costs)                  | 10%          | 4, 5       |
| Working/startup capital (% of fixed capital investment)       | 10%          | 4, 5       |
| <b>Utility prices</b>                                         |              |            |
| Electricity price (\$/kWh)                                    | 0.07         | 6-8        |
| Raw water price (\$/m <sup>3</sup> )                          | 1.5          | 9          |
| Natural gas price (\$/GJ)                                     | 5.5          | 9          |
| <b>Raw materials and product prices</b>                       |              |            |
| Methanol (\$/t)                                               | 339          | 9, 10      |
| WCO (\$/t)                                                    | 826          | 11, 12     |
| Glycerol (\$/t)                                               | 1300         | 13         |

**Table S3.** ANOVA for the response surface quadratic model

| Source          | SoS*    | Df* | Mean square | F-value | p-value | Significance    |
|-----------------|---------|-----|-------------|---------|---------|-----------------|
| Model           | 3376.89 | 10  | 337.69      | 11.19   | <0.0001 | Significant     |
| A (Temperature) | 164.08  | 1   | 164.08      | 5.44    | 0.0331  |                 |
| B (Pressure)    | 61.82   | 1   | 61.82       | 2.05    | 0.1717  |                 |
| C (Time)        | 51.67   | 1   | 51.67       | 1.71    | 0.2092  |                 |
| D (M:O ratio)   | 1060.32 | 1   | 1060.32     | 35.13   | <0.0001 |                 |
| AC              | 674.98  | 1   | 674.98      | 22.36   | 0.0002  |                 |
| AD              | 19.50   | 1   | 19.50       | 0.6460  | 0.4333  |                 |
| BD              | 143.11  | 1   | 143.11      | 4.74    | 0.0448  |                 |
| CD              | 28.35   | 1   | 28.35       | 0.9391  | 0.3469  |                 |
| A <sup>2</sup>  | 1138.18 | 1   | 1138.18     | 37.71   | <0.0001 |                 |
| D <sup>2</sup>  | 157.08  | 1   | 157.08      | 5.20    | 0.0366  |                 |
| Residual        | 482.97  | 16  | 30.19       |         |         |                 |
| Lack of fit     | 331.82  | 14  | 23.70       | 0.3136  | 0.9277  | Not significant |

\*SoS, sum of squares; Df, degrees of freedom.

The model's fit was further evaluated using the coefficient of determination ( $R^2$ ), predicted  $R^2$ , adjusted  $R^2$ , and adequate precision (Table S2).  $R^2$  showed that 87.5% of the variation in biodiesel yield was explained by the model. The predicted  $R^2$  closely matched the adjusted  $R^2$  (difference <0.2), indicating strong predictive ability for new data. Additionally, the adequate precision, which measures the signal-to-noise ratio, exceeded the threshold of 4, confirming a reliable signal across the tests. Moreover, the coefficient of variation (CV) of 6.90% indicates minimal relative dispersion around the mean, demonstrating high precision in the predicted biodiesel yields. These metrics emphasize the model's reliability, precision, and consistency in predicting biodiesel yield.

**Table S4.** Summary of model fit statistics

| Metric             | Value   |
|--------------------|---------|
| Std. dev.          | 5.49    |
| Mean               | 79.62   |
| CV %               | 6.90    |
| $R^2$              | 0.8749  |
| Adjusted $R^2$     | 0.7967  |
| Predicted $R^2$    | 0.6141  |
| Adequate precision | 10.9989 |

**Table S5.** Validation table with 95% confidence interval

| Predicted<br>mean | Predicted<br>median | Std dev | n* | SE Pred | 95% PI<br>low | Data<br>mean | 95% PI<br>high |
|-------------------|---------------------|---------|----|---------|---------------|--------------|----------------|
| 95.9241           | 95.9241             | 5.49415 | 4  | 4.00401 | 87.436        | 92.2775      | 104.412        |

\*n, number of experiments.

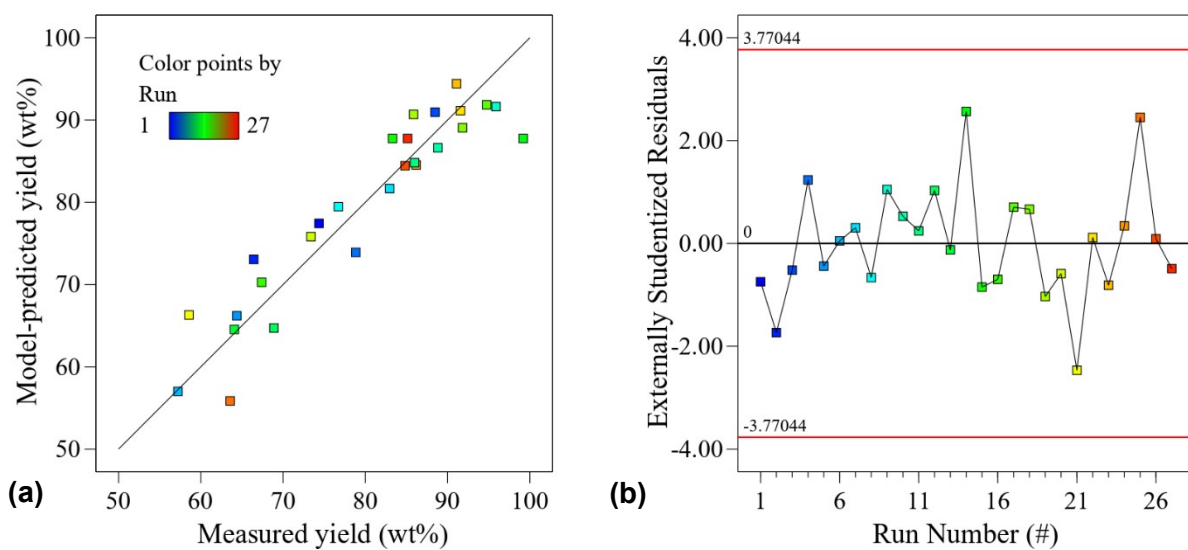

**Fig. S1.** Comparison of model-predicted versus experimentally observed biodiesel yield (a) and plot of residuals versus experimental run (b).

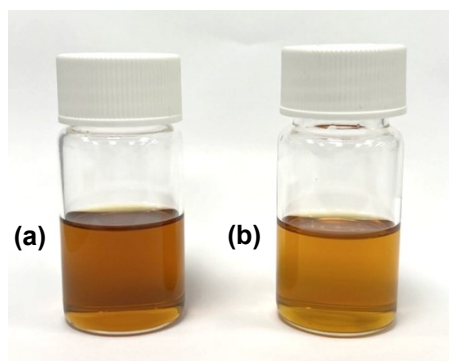

**Fig. S2.** Samples of (a) untreated WCO and (b) supercritical biodiesel after centrifugation.

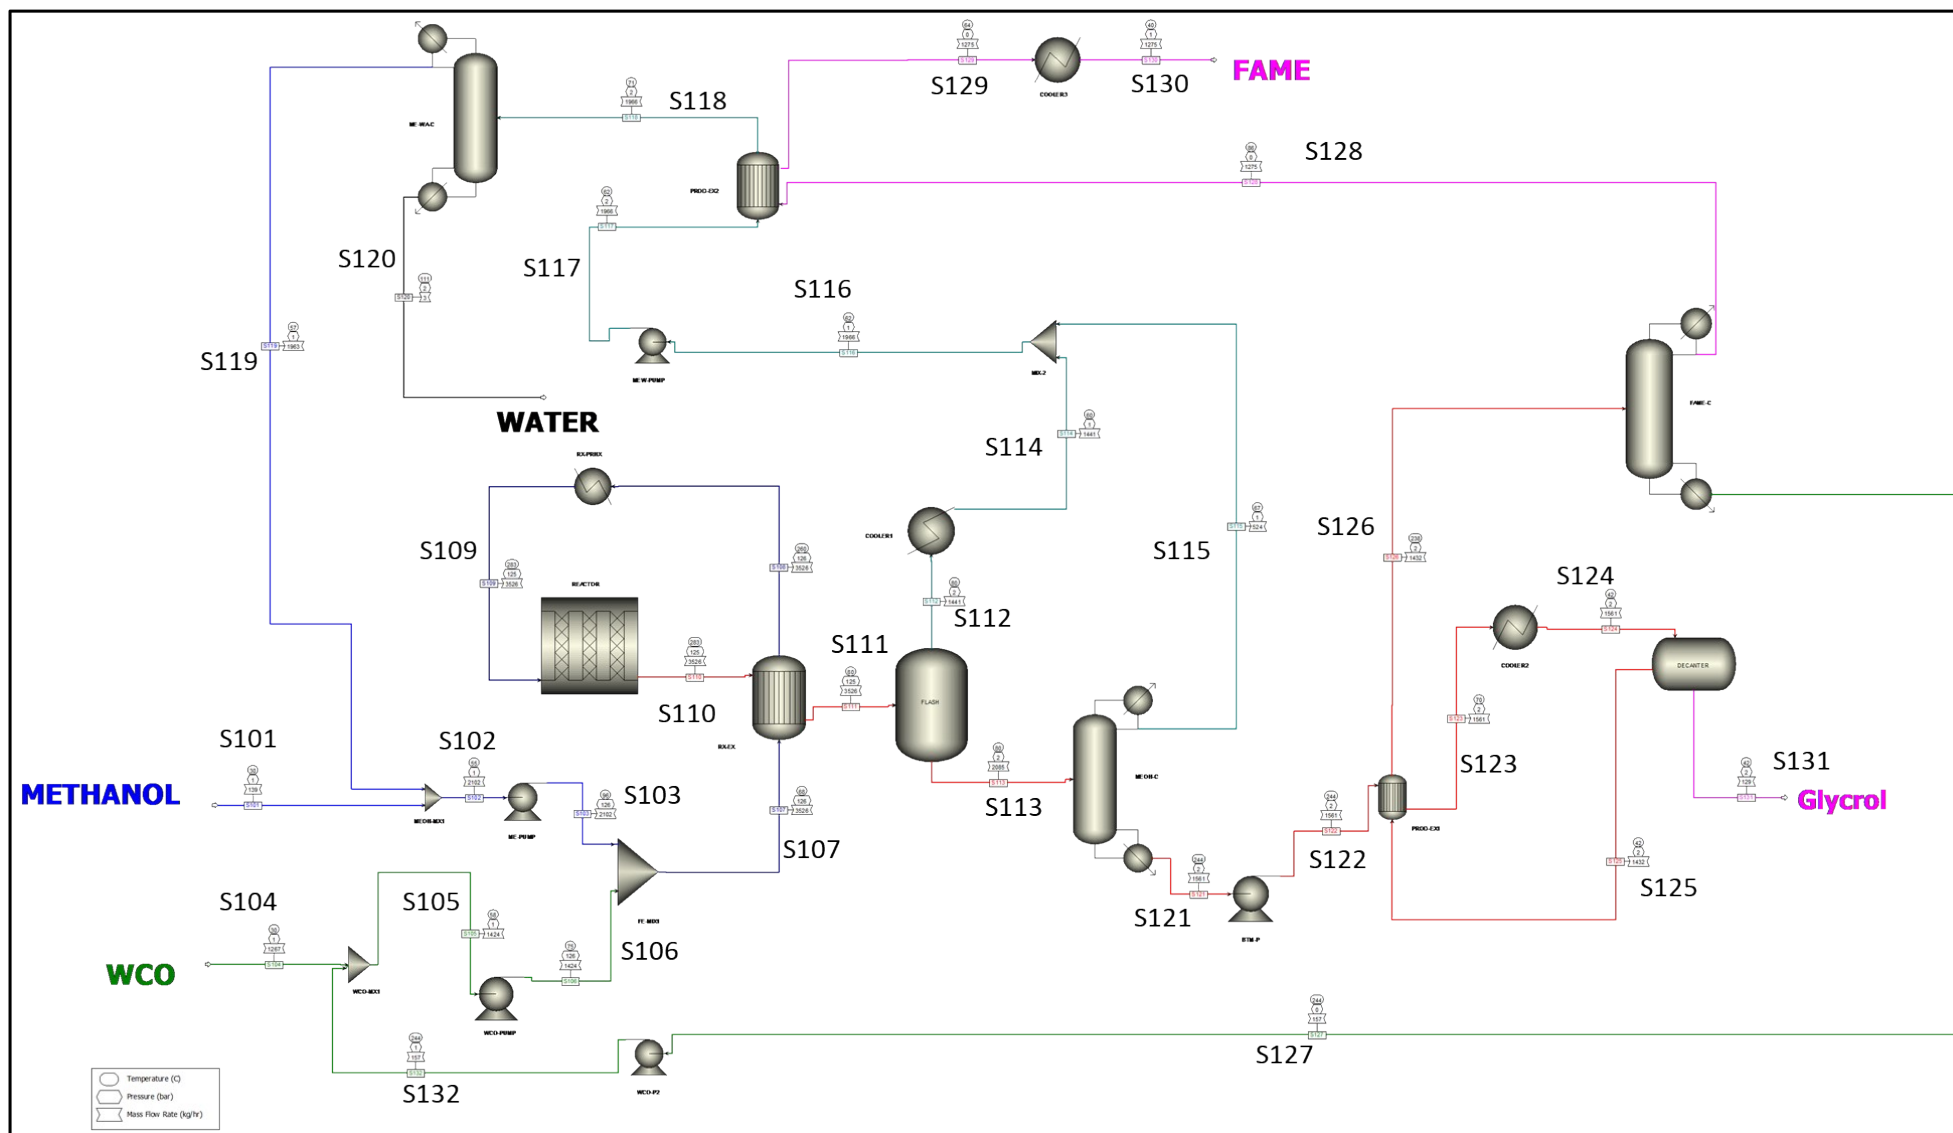

**Fig. S3.** Process flow diagram of biodiesel production via the SCM process including stream numbers.

**Table S6.** Material and energy balances for various process streams

|                      | Units   | S101                   | S102             | S103            | S104              | S105         | S106         | S107                                        | S108                        | S109                     | S110                     | S111                      | S112          | S113                       | S114                      | S115                            | S116                    |
|----------------------|---------|------------------------|------------------|-----------------|-------------------|--------------|--------------|---------------------------------------------|-----------------------------|--------------------------|--------------------------|---------------------------|---------------|----------------------------|---------------------------|---------------------------------|-------------------------|
| Description          |         | Fresh Methanol from BL | Methanol to Pump | Methanol to Mix | Fresh WCO from BL | WCO to Pump  | WCO to Mix   | Combined feed to Feed/Effluent RX Exchanger | Combined feed to pre-heater | Combined feed to Reactor | Raw product from Reactor | Raw product to flash drum | Flashed vapor | Raw product to MEOH Column | Recovered MEOH from Flash | Recovered MEOH from MEOH Column | Recovered MEOH from Mix |
| From                 |         | From BL                | MEOH-MX1         | ME-PUMP         | From BL           | WCO-MX1      | WCO-PUMP     | FE-MIX1                                     | RX-EX                       | RX-PRHX                  | REACTOR                  | RX-EX                     | FLASH         | FLASH                      | COOLER1                   | MEOH-C                          | MIX-2                   |
| To                   |         | MEOH-MX1               | ME-PUMP          | FE-MIX1         | WCO-MX1           | WCO-PUMP     | FE-MIX1      | RX-EX                                       | RX-PRHX                     | REACTOR                  | RX-EX                    | FLASH                     | COOLER1       | MEOH-C                     | MIX-2                     | MIX-2                           | MEW-PUMP                |
| Phase                |         | Liquid Phase           | Liquid Phase     | Liquid Phase    | Liquid Phase      | Liquid Phase | Liquid Phase | Liquid Phase                                | Liquid Phase                | Liquid Phase             | Liquid Phase             | Liquid Phase              | Vapor Phase   | Liquid Phase               | Liquid Phase              | Liquid Phase                    | Liquid Phase            |
| Temperature          | C       | 30.0                   | 55.0             | 96.6            | 30.0              | 57.7         | 74.8         | 67.6                                        | 260.5                       | 282.8                    | 282.8                    | 80.0                      | 80.0          | 80.0                       | 60.0                      | 66.7                            | 61.8                    |
| Pressure             | bar     | 1.01325                | 1.01325          | 126             | 1.01325           | 1.01325      | 126          | 126                                         | 126                         | 125                      | 125                      | 125                       | 1.5           | 1.5                        | 1.1                       | 1.1                             | 1.1                     |
| Mass Liquid Fraction |         | 1.0                    | 1.0              | 1.0             | 1.0               | 1.0          | 1.0          | 1.0                                         | 1.0                         | 1.0                      | 1.0                      | 1.0                       | 0.0           | 1.0                        | 1.0                       | 1.0                             | 1.0                     |
| Molar Enthalpy       | ca/mol  | -56831.4               | -56238.1         | -55775.9        | -471840.8         | -441663.6    | -431337.1    | -65841.6                                    | -55868.3                    | -55353.4                 | -55763.2                 | -65735.1                  | -47412.7      | -86507.0                   | -56136.3                  | -55968.8                        | -56091.8                |
| Mass Enthalpy        | cal/gm  | -1773.6                | -1755.1          | -1740.7         | -573.1            | -560.3       | -547.2       | -1258.6                                     | -1068.0                     | -1058.3                  | -1066.1                  | -1256.7                   | -1480.9       | -927.4                     | -1753.4                   | -1748.9                         | -1752.2                 |
| Molar Density        | mol/cc  | 0.0                    | 0.0              | 0.0             | 0.0               | 0.0          | 0.0          | 0.0                                         | 0.0                         | 0.0                      | 0.0                      | 0.0                       | 0.0           | 0.0                        | 0.0                       | 0.0                             | 0.0                     |
| Mass Density         | gm/cc   | 0.8                    | 0.8              | 0.7             | 0.8               | 0.8          | 0.8          | 0.5                                         | 0.3                         | 0.3                      | 0.3                      | 0.7                       | 0.0           | 0.7                        | 0.8                       | 0.7                             | 0.7                     |
| Enthalpy Flow        | cal/sec | -68485.6               | -1024907.7       | -1016484.8      | -201761.0         | -221670.9    | -216488.0    | -1232972.7                                  | -1046209.8                  | -1036709.9               | -1044385.0               | -1231147.9                | -593908.0     | -536566.1                  | -703181.8                 | -253625.7                       | -956807.6               |
| Average MW           |         | 32.0                   | 32.0             | 32.0            | 823.3             | 788.3        | 788.3        | 52.3                                        | 52.3                        | 52.3                     | 52.3                     | 52.3                      | 32.0          | 93.3                       | 32.0                      | 32.0                            | 32.0                    |
| Mole Flows           | kmol/hr | 4.3                    | 65.6             | 65.6            | 1.5               | 1.8          | 1.8          | 67.4                                        | 67.4                        | 67.4                     | 67.4                     | 67.4                      | 45.1          | 22.3                       | 45.1                      | 16.3                            | 61.4                    |
| Mass Flows           | kg/hr   | 139.0                  | 2102.2           | 2102.2          | 1267.3            | 1424.4       | 1424.4       | 3526.6                                      | 3526.6                      | 3526.7                   | 3526.7                   | 3526.7                    | 1443.8        | 2082.9                     | 1443.8                    | 522.1                           | 1965.8                  |
| TRIPA-01             | kg/hr   | 0.0                    | 0.0              | 0.0             | 108.7             | 119.1        | 119.1        | 119.1                                       | 119.1                       | 119.1                    | 10.4                     | 10.4                      | 0.0           | 10.4                       | 0.0                       | 0.0                             | 0.0                     |
| TRIOI-01             | kg/hr   | 0.0                    | 0.0              | 0.0             | 1118.6            | 1225.8       | 1225.8       | 1225.8                                      | 1225.8                      | 1225.6                   | 107.1                    | 107.1                     | 0.0           | 107.1                      | 0.0                       | 0.0                             | 0.0                     |
| OLEIC-01             | kg/hr   | 0.0                    | 0.0              | 0.0             | 39.9              | 40.0         | 40.0         | 40.0                                        | 40.0                        | 40.0                     | 1.1                      | 1.1                       | 0.0           | 1.1                        | 0.0                       | 0.0                             | 0.0                     |
| METHA-01             | kg/hr   | 139.0                  | 2102.2           | 2102.2          | 0.0               | 0.0          | 0.0          | 2102.2                                      | 2102.2                      | 2102.5                   | 1963.7                   | 1963.7                    | 1442.0        | 521.7                      | 1442.0                    | 521.7                           | 1963.2                  |
| WATER                | kg/hr   | 0.0                    | 0.0              | 0.0             | 0.0               | 0.0          | 0.0          | 0.0                                         | 0.0                         | 0.0                      | 2.5                      | 2.5                       | 1.6           | 0.9                        | 1.6                       | 0.9                             | 2.5                     |
| GLYCE-01             | kg/hr   | 0.0                    | 0.0              | 0.0             | 0.0               | 0.0          | 0.0          | 0.0                                         | 0.0                         | 0.0                      | 128.7                    | 128.7                     | 0.1           | 128.6                      | 0.1                       | 0.0                             | 0.1                     |
| METHY-01             | kg/hr   | 0.0                    | 0.0              | 0.0             | 0.0               | 0.8          | 0.8          | 0.8                                         | 0.8                         | 0.8                      | 110.0                    | 110.0                     | 0.0           | 110.0                      | 0.0                       | 0.0                             | 0.0                     |
| METHY-02             | kg/hr   | 0.0                    | 0.0              | 0.0             | 0.0               | 38.6         | 38.6         | 38.6                                        | 38.6                        | 38.6                     | 1203.2                   | 1203.2                    | 0.0           | 1203.1                     | 0.0                       | 0.0                             | 0.0                     |
| Mass Fractions       |         |                        |                  |                 |                   |              |              |                                             |                             |                          |                          |                           |               |                            |                           |                                 |                         |
| TRIPA-01             |         | 0.0                    | 0.0              | 0.0             | 0.1               | 0.1          | 0.1          | 0.0                                         | 0.0                         | 0.0                      | 0.0                      | 0.0                       | 0.0           | 0.0                        | 0.0                       | 0.0                             | 0.0                     |
| TRIOI-01             |         | 0.0                    | 0.0              | 0.0             | 0.9               | 0.9          | 0.9          | 0.3                                         | 0.3                         | 0.3                      | 0.0                      | 0.0                       | 0.0           | 0.1                        | 0.0                       | 0.0                             | 0.0                     |
| OLEIC-01             |         | 0.0                    | 0.0              | 0.0             | 0.0               | 0.0          | 0.0          | 0.0                                         | 0.0                         | 0.0                      | 0.0                      | 0.0                       | 0.0           | 0.0                        | 0.0                       | 0.0                             | 0.0                     |
| METHA-01             |         | 1.0                    | 1.0              | 1.0             | 0.0               | 0.0          | 0.0          | 0.6                                         | 0.6                         | 0.6                      | 0.6                      | 0.6                       | 1.0           | 0.3                        | 1.0                       | 1.0                             | 1.0                     |
| WATER                |         | 0.0                    | 0.0              | 0.0             | 0.0               | 0.0          | 0.0          | 0.0                                         | 0.0                         | 0.0                      | 0.0                      | 0.0                       | 0.0           | 0.0                        | 0.0                       | 0.0                             | 0.0                     |
| GLYCE-01             |         | 0.0                    | 0.0              | 0.0             | 0.0               | 0.0          | 0.0          | 0.0                                         | 0.0                         | 0.0                      | 0.0                      | 0.0                       | 0.0           | 0.1                        | 0.0                       | 0.0                             | 0.0                     |
| METHY-01             |         | 0.0                    | 0.0              | 0.0             | 0.0               | 0.0          | 0.0          | 0.0                                         | 0.0                         | 0.0                      | 0.0                      | 0.0                       | 0.0           | 0.1                        | 0.0                       | 0.0                             | 0.0                     |
| METHY-02             |         | 0.0                    | 0.0              | 0.0             | 0.0               | 0.0          | 0.0          | 0.0                                         | 0.0                         | 0.0                      | 0.3                      | 0.3                       | 0.0           | 0.6                        | 0.0                       | 0.0                             | 0.0                     |
| Volume Flow          | l/min   | 2.9                    | 46.3             | 50.4            | 25.6              | 31.1         | 31.5         | 120.4                                       | 190.6                       | 223.8                    | 171.4                    | 81.3                      | 14712.0       | 46.6                       | 32.1                      | 11.7                            | 43.8                    |

**Table S6.** Material and energy balances for various process streams (Cont.)

|                      | S117                         | S118                         | S119                       | S120                     | S121                 | S122                     | S123                         | S124                    | S125                 | S126               | S127                  | S128                      | S129                     | S130                | S131         | S132         |
|----------------------|------------------------------|------------------------------|----------------------------|--------------------------|----------------------|--------------------------|------------------------------|-------------------------|----------------------|--------------------|-----------------------|---------------------------|--------------------------|---------------------|--------------|--------------|
| Description          | Recovered MEOH from MEW-PUMP | Recovered MEOH from PROD-EX2 | Recycled MEOH from ME-WA-C | Waste Water from ME-WA-C | Raw product to BTM-P | Raw product to BPROD-EX1 | Raw product to BPROD-COOLER2 | Raw product to DECANTER | Raw FAME to PROD-EX1 | Raw FAME to FAME-C | Recycle WCO to WCO-P2 | Purified FAME from FAME-C | Purified FAME to COOLER3 | Purified FAME to BL | Glycerol     | Recycle WCO  |
| From                 | MEW-PUMP                     | PROD-EX2                     | ME-WA-C                    | ME-WA-C                  | MEOH-C               | BTM-P                    | PROD-EX1                     | COOLER2                 | DECANTER             | PROD-EX1           | FAME-C                | FAME-C                    | PROD-EX2                 | COOLER3             | DECANTER     | WCO-P2       |
| To                   | PROD-EX2                     | ME-WA-C                      | MEOH-MX1                   |                          | BTM-P                | PROD-EX1                 | COOLER2                      | DECANTER                | PROD-EX1             | FAME-C             | WCO-P2                | PROD-EX2                  | COOLER3                  | BL                  | BL           | WCO-MX1      |
| Phase                | Liquid Phase                 | Liquid Phase                 | Liquid Phase               | Liquid Phase             | Liquid Phase         | Liquid Phase             | Liquid Phase                 | Liquid Phase            | Liquid Phase         | Liquid Phase       | Liquid Phase          | Liquid Phase              | Liquid Phase             | Liquid Phase        | Liquid Phase | Liquid Phase |
| Temperature          | 61.9                         | 70.8                         | 56.6                       | 88.4                     | 244.2                | 244.2                    | 70.0                         | 42.0                    | 42.0                 | 238.2              | 244.1                 | 85.9                      | 64.0                     | 40.0                | 42           | 244.3694391  |
| Pressure             | 2                            | 2                            | 1.1                        | 1.5                      | 1.8                  | 1.5                      | 1.5                          | 1.5                     | 1.5                  | 1.5                | 0.028                 | 0.013332237               | 0.013332237              | 1.1                 | 1.5          | 1.01325      |
| Mass Liquid Fraction | 1.0                          | 1.0                          | 1.0                        | 1.0                      | 1.0                  | 1.0                      | 1.0                          | 1.0                     | 1.0                  | 1.0                | 1.0                   | 1.0                       | 1.0                      | 1.0                 | 1.0          | 1.0          |
| Molar Enthalpy       | -56088.7                     | -55850.5                     | -56196.1                   | -67995.5                 | -146183.3            | -146184.2                | -172484.6                    | -176246.1               | -182508.3            | -148232.7          | -268071.7             | -166690.6                 | -170053.1                | -173651.0           | -158092.4    | -267981.0    |
| Mass Enthalpy        | -1752.1                      | -1744.6                      | -1753.8                    | -3576.1                  | -563.4               | -563.4                   | -664.8                       | -679.3                  | -588.0               | -477.6             | -456.5                | -568.2                    | -579.6                   | -591.9              | -1722.1      | -456.4       |
| Molar Density        | 0.0                          | 0.0                          | 0.0                        | 0.0                      | 0.0                  | 0.0                      | 0.0                          | 0.0                     | 0.0                  | 0.0                | 0.0                   | 0.0                       | 0.0                      | 0.0                 | 0.0          | 0.0          |
| Mass Density         | 0.7                          | 0.7                          | 0.8                        | 0.9                      | 0.6                  | 0.6                      | 0.8                          | 0.8                     | 0.8                  | 0.6                | 0.5                   | 0.8                       | 0.8                      | 0.9                 | 1.3          | 0.5          |
| Enthalpy Flow        | -956754.5                    | -952692.9                    | -956422.1                  | -2619.0                  | -244275.3            | -244276.7                | -288225.3                    | -294510.8               | -234014.3            | -190065.7          | -19916.6              | -201348.3                 | -205409.9                | -209755.9           | -61553.3     | -19909.9     |
| Average MW           | 32.0                         | 32.0                         | 32.0                       | 19.0                     | 259.5                | 259.5                    | 259.5                        | 259.5                   | 310.4                | 310.4              | 587.2                 | 293.4                     | 293.4                    | 293.4               | 91.8         | 587.2        |
| Mole Flows           | 61.4                         | 61.4                         | 61.3                       | 0.1                      | 6.0                  | 6.0                      | 6.0                          | 6.0                     | 4.6                  | 4.6                | 0.3                   | 4.3                       | 4.3                      | 4.3                 | 1.4          | 0.3          |
| Mass Flows           | 1965.8                       | 1965.8                       | 1963.2                     | 2.6                      | 1560.9               | 1560.9                   | 1560.9                       | 1560.9                  | 1432.8               | 1432.8             | 157.1                 | 1275.7                    | 1275.7                   | 1275.7              | 128.7        | 157.1        |
| TRIPA-01             | 0.0                          | 0.0                          | 0.0                        | 0.0                      | 10.4                 | 10.4                     | 10.4                         | 10.4                    | 10.4                 | 10.4               | 10.4                  | 0.0                       | 0.0                      | 0.0                 | 0.0          | 10.4         |
| TRIOI-01             | 0.0                          | 0.0                          | 0.0                        | 0.0                      | 107.1                | 107.1                    | 107.1                        | 107.1                   | 107.1                | 107.1              | 107.1                 | 0.0                       | 0.0                      | 0.0                 | 0.0          | 107.1        |
| OLEIC-01             | 0.0                          | 0.0                          | 0.0                        | 0.0                      | 1.1                  | 1.1                      | 1.1                          | 1.1                     | 1.1                  | 1.1                | 0.1                   | 1.0                       | 1.0                      | 1.0                 | 0.0          | 0.1          |
| METHA-01             | 1963.2                       | 1963.2                       | 1963.2                     | 0.0                      | 0.5                  | 0.5                      | 0.5                          | 0.5                     | 0.3                  | 0.3                | 0.0                   | 0.3                       | 0.3                      | 0.3                 | 0.2          | 0.0          |
| WATER                | 2.5                          | 2.5                          | 0.0                        | 2.5                      | 0.0                  | 0.0                      | 0.0                          | 0.0                     | 0.0                  | 0.0                | 0.0                   | 0.0                       | 0.0                      | 0.0                 | 0.0          | 0.0          |
| GLYCE-01             | 0.1                          | 0.1                          | 0.0                        | 0.1                      | 128.6                | 128.6                    | 128.6                        | 128.6                   | 0.2                  | 0.2                | 0.0                   | 0.2                       | 0.2                      | 0.2                 | 128.4        | 0.0          |
| METHY-01             | 0.0                          | 0.0                          | 0.0                        | 0.0                      | 110.0                | 110.0                    | 110.0                        | 110.0                   | 110.1                | 110.1              | 0.8                   | 109.3                     | 109.3                    | 109.3               | 0.0          | 0.8          |
| METHY-02             | 0.0                          | 0.0                          | 0.0                        | 0.0                      | 1203.1               | 1203.1                   | 1203.1                       | 1203.1                  | 1203.6               | 1203.6             | 38.6                  | 1165.0                    | 1165.0                   | 1165.0              | 0.0          | 38.6         |
| Mass Fractions       |                              |                              |                            |                          |                      |                          |                              |                         |                      |                    |                       |                           |                          |                     |              |              |
| TRIPA-01             | 0.0                          | 0.0                          | 0.0                        | 0.0                      | 0.0                  | 0.0                      | 0.0                          | 0.0                     | 0.0                  | 0.0                | 0.1                   | 0.0                       | 0.0                      | 0.0                 | 0.0          | 0.1          |
| TRIOI-01             | 0.0                          | 0.0                          | 0.0                        | 0.0                      | 0.1                  | 0.1                      | 0.1                          | 0.1                     | 0.1                  | 0.1                | 0.7                   | 0.0                       | 0.0                      | 0.0                 | 0.0          | 0.7          |
| OLEIC-01             | 0.0                          | 0.0                          | 0.0                        | 0.0                      | 0.0                  | 0.0                      | 0.0                          | 0.0                     | 0.0                  | 0.0                | 0.0                   | 0.0                       | 0.0                      | 0.0                 | 0.0          | 0.0          |
| METHA-01             | 1.0                          | 1.0                          | 1.0                        | 0.0                      | 0.0                  | 0.0                      | 0.0                          | 0.0                     | 0.0                  | 0.0                | 0.0                   | 0.0                       | 0.0                      | 0.0                 | 0.0          | 0.0          |
| WATER                | 0.0                          | 0.0                          | 0.0                        | 0.9                      | 0.0                  | 0.0                      | 0.0                          | 0.0                     | 0.0                  | 0.0                | 0.0                   | 0.0                       | 0.0                      | 0.0                 | 0.0          | 0.0          |
| GLYCE-01             | 0.0                          | 0.0                          | 0.0                        | 0.0                      | 0.1                  | 0.1                      | 0.1                          | 0.1                     | 0.0                  | 0.0                | 0.0                   | 0.0                       | 0.0                      | 0.0                 | 1.0          | 0.0          |
| METHY-01             | 0.0                          | 0.0                          | 0.0                        | 0.0                      | 0.1                  | 0.1                      | 0.1                          | 0.1                     | 0.1                  | 0.1                | 0.0                   | 0.1                       | 0.1                      | 0.1                 | 0.0          | 0.0          |
| METHY-02             | 0.0                          | 0.0                          | 0.0                        | 0.0                      | 0.8                  | 0.8                      | 0.8                          | 0.8                     | 0.8                  | 0.8                | 0.2                   | 0.9                       | 0.9                      | 0.9                 | 0.0          | 0.2          |
| Volume Flow          | 43.8                         | 44.5                         | 43.4                       | 0.0                      | 40.8                 | 40.8                     | 34.3                         | 33.6                    | 30.8                 | 37.1               | 5.1                   | 25.7                      | 25.2                     | 24.8                | 1.7          | 5.1          |

- (1) Kumar, D.; Long, S. P.; Arora, A.; Singh, V. Techno-economic feasibility analysis of engineered energycane-based biorefinery co-producing biodiesel and ethanol. *GCB Bioenergy* **2021**, *13* (9), 1498–1514.
- (2) Sukor, N. R.; Shamsuddin, A. H.; Mahlia, T. M. I.; Mat Isa, M. F. Techno-economic analysis of CO<sub>2</sub> capture technologies in offshore natural gas field: Implications to carbon capture and storage in Malaysia. *Processes* **2020**, *8* (3), 350.
- (3) Apostolakou, A.; Kookos, I.; Marazioti, C.; Angelopoulos, K. Techno-economic analysis of a biodiesel production process from vegetable oils. *Fuel Processing Technology* **2009**, *90* (7-8), 1023–1031.
- (4) Turton, R.; Bailie, R. C.; Whiting, W. B.; Shaeiwitz, J. A. *Analysis, synthesis and design of chemical processes*; Pearson education, 2008.
- (5) Al-Sakkari, E. G.; Mohammed, M. G.; Elozeiri, A. A.; Abdeldayem, O. M.; Habashy, M. M.; Ong, E. S.; Rene, E. R.; Ismail, I.; Ashour, I. Comparative technoeconomic analysis of using waste and virgin cooking oils for biodiesel production. *Frontiers in Energy Research* **2020**, *8*, 583357.
- (6) Haas, M. J.; McAloon, A. J.; Yee, W. C.; Foglia, T. A. A process model to estimate biodiesel production costs. *Bioresource technology* **2006**, *97* (4), 671–678.
- (7) Khan, M.; Nabil, S. K.; Al-Attas, T.; Yasri, N. G.; Roy, S.; Rahman, M.; Larter, S.; Ajayan, P. M.; Hu, J.; Kibria, M. G. Zero-crossover electrochemical CO<sub>2</sub> reduction to ethylene with co-production of valuable chemicals. *Chem Catalysis* **2022**, *2* (8), 2077–2095.
- (8) [https://www.eia.gov/electricity/monthly/epm\\_table\\_grapher.php?t=table\\_5\\_03](https://www.eia.gov/electricity/monthly/epm_table_grapher.php?t=table_5_03).
- (9) Nagapurkar, P.; Smith, J. D. Techno-economic and life cycle analyses for a supercritical biodiesel production process from waste cooking oil for a plant located in the Midwest United States: P. Nagapurkar et al. *Environment, Development and Sustainability* **2025**, *27* (9), 22749–22773.
- (10) <https://methanol.org/methanol-price-supply-demand/>.
- (11) <https://www.rti-inc.com/blog/how-much-is-used-cooking-oil-worth/>.
- (12) <https://www.commodity3.com/instrument/TLW1MNF1/yellow-grease>.
- (13) Pandit, K.; Jeffrey, C.; Keogh, J.; Tiwari, M. S.; Artioli, N.; Manyar, H. G. Techno-economic assessment and sensitivity analysis of glycerol valorization to biofuel additives via esterification. *Industrial & Engineering Chemistry Research* **2023**, *62* (23), 9201–9210.
